# Supplementary material
Source: publisher figshare collection journal article supplement (https://tandf.figshare.com/ndownloader/files/15616148)
Supplement: Supplementary file 1 [file 15616148]

Design, Synthesis and Herbicidal Activity of Novel Cyclic Phosphonates with Diaryl Ethers Containing Pyrimidine

Shasha Zhanga, Xinjuan Guoa, Yuan Zhoua, Yalan Yanga, Hao Penga,*, Hongwu Hea,*

Key Laboratory of Pesticide & Chemical Biology (CCNU), Ministry of Education; College of Chemistry, Central China Normal University, Wuhan 430079, China.

Email: he1208@mail.ccnu.edu.cn;

**Supplemental Materials**

***Herbicidal Testing***

Plastic pots were packed with germinating seeds and the 9 mL diluted formulation of each compound containing N,N-dimethylformamide (DMF) and Tween 80 was applied into the pots at 200 mg/L and grown at 25 °C for seven days. Twenty days later the inhibition activity against the growth weed toot and stem of each weed was visually post-emergence the solution of the chemicals tested was applied to the foliage of plants grown at 3 leaves stage with a sprayer at the rate of 450, 225, 112.5 g ai/ha. All treatments were replicated three times in a completely randomized design. Test plants were harvested 30 days after sowing, and they were evaluated for post-emergence herbicidal activity.

The synthesis of the intermediates and the compounds

Synthesis of Compound **M-1**

According to the literatures, neopentyl glycol (0.1 mol, 10.40 g) was dissolved in anhydrous 1,2-dichloroethane (40 mL). Phosphorus trichloride (0.11 mol，15.13 g) was added dropwise under 5 oC below zero, then stired for 3h at 6~10 oC. The solution of anhydrous ethanol (0.1 mol，4.60 g) and anhydrous 1,2-dichloroethane (20 mL) was added slowly at the temperature of 25oC and the mixture was refluxed for 1.5h. The reaction mixture was desolventized under decompression to give white solid.

Synthesis of Compound **M-2**

Compound **M-1** (0.03mol, 4.50 g) and substituted aromatic aldehydes (0.03 mol) were soluted into anhydrous DCM (15mL). Triethylamine (0.015 mol, 1.52) was added dropwise under the ice baths. Then the mixture was stirred at 25 oC for 4−6 h, and then was monitored by TLC until the end. The reaction mixture was desolventized under reduced pressure. After recrystallization from EtOAc, final white solid compounds **M-2** were obtained.

Synthesis of Compound **M-3**

4,6-dimethoxy-2-(methylsulfonyl)pyrimidine (0.02 mol, 4.36g) and methyl 2-hydroxybenzoate (0.02 mol, 4.36 g) were mixed, then anhydrous K2CO3 (0.04 mol, 5.52 g) and DMF (40 mL) were added. The reaction mixture was heated at 65 oC, which was monitored by TLC until the disappearance of starting materials. The mixture was poured into water (100 mL) quickly, and then filtered. The crude solid was washed by water some times and dried to give white solid.

Synthesis of Compound **M-4**

To solution of Compound **M-3** methyl 2-((4,6-dimethoxypyrimidin-2-yl)oxy)benzoate (0.01 mol，2.91 g) and DMSO (20 mL) was added 20% KOH solution（0.015 mol，0.84 g） dropwise with stirring. The mixed solution was stirred at 25 oC and monitored by TLC to the end. The reaction solution was poured into water (100mL). With stirring, the pH of the solution was adjusted to below 2 with saturated citric acid solution. The precipitated solid was filtered, washed with water several times, dried to give white solid.

General Procedure for Compounds **IA-1**~**IA-13**

To a solution of compound **M-4** (5 mmol) in CH2Cl2 (20 mL) the respective intermediate **M-2**(5 mmol) was added with stirring. DMAP as catalyst was added, then the reaction mixture was cooled down to 0oC. DCC (5 mmol) in anhydrous dichloromethane (20 mL) was added dropwise. The mixture was stirred at 25oC and monitored by TLC. The reaction mixture was filtered. And the filtrate was treated with slightly acidified with 5% HCl solution, saturated sodium bicarbonate solution and saturated brines in turn, then dried by anhydrous sodium sulfate. The solvent was evaporated to give the crude product. Further purification was carried out by silica gel column chromatography with petroleum ether/EtOAc (3:1) as eluent to gain the title compounds (Table S 1).

**Table S 1:** Physio-chemical properties of title compounds **IA**-**1**~**IA**-**13**

| No. | R | Appearance | m.p /oC | Yield /% |
| --- | --- | --- | --- | --- |
| **IA-1** | -CH3 | White Solid | 95-98 | 85 |
| **IA-2** | -CH2CH3 | White Solid | 80-81 | 63 |
| **IA-3** | C6H5 | White Solid | 107-109 | 66 |
| **IA-4** | 2-furyl | Yellow Solid | 139-142 | 68 |
| **IA-5** | 4-FC6H4 | White Solid | 110-112 | 85 |
| **IA-6** | 4-BrC6H4 | White Solid | 135-137 | 63 |
| **IA-7** | 3- NO2C6H4 | White Solid | 150-151 | 66 |
| **IA-8** | 4-CH3C6H4 | White Solid | 132-135 | 56 |
| **IA-9** | 4-OCH3C6H4 | White Solid | 112-114 | 79 |
| **IA-10** | 3-ClC6H4 | White Solid | 127-130 | 62 |
| **IA-11** | 2,4-Cl2C6H3 | White Solid | 141-142 | 67 |
| **IA-12** | 3,4-Cl2C6H3 | White Solid | 131-132 | 82 |
| **IA-13** | 2-thienyl | White Solid | 115-117 | 55 |

**Table S 2:** Inhibition of compounds **IA** on the growth of weed root at 200 mg/L

| **Compd.** | R | Root, inhibition(%) | | | | | |
| --- | --- | --- | --- | --- | --- | --- | --- |
| monocotyledons | | | dicotyledons | | |
| *Triticum aestivum* | *Echinochloa crusgalli* | *Sorghum bicolor* (L.) Moench | *Brassica campestris,* | *Raphanus sativus* L | *Cucumis sativus* |
| **IA-1** | CH3 | 0 | 0 | 0 | 0 | 0 | 0 |
| **IA-2** | CH2CH3 | 95 | 100 | 95 | 50 | 40 | 70 |
| **IA-3** | Ph | 30 | 30 | 90 | 90 | 90 | 60 |
| **IA-4** | 2-furyl | 60 | 0 | 0 | 0 | 0 | 0 |
| **IA-5** | 4-FPh | 80 | 0 | 0 | 90 | 90 | 90 |
| **IA-6** | 4-BrPh | 0 | 0 | 0 | 90 | 90 | 60 |
| **IA-7** | 3- NO2Ph | 80 | 0 | 0 | 90 | 90 | 100 |
| **IA-8** | 4-CH3Ph | 0 | 0 | 0 | 80 | 80 | 80 |
| **IA-9** | 4-OCH3Ph | 0 | 0 | 0 | 90 | 90 | 80 |
| **IA-10** | 3-ClPh | 0 | 0 | 0 | 80 | 80 | 80 |
| **IA-11** | 2,4-Cl2Ph | 0 | 0 | 0 | 80 | 80 | 0 |
| **IA-12** | 3,4-Cl2Ph | 0 | 0 | 0 | 0 | 0 | 0 |
| **IA-13** | 2-thienyl | 0 | 0 | 0 | 100 | 100 | 90 |

**Table S 3:** Inhibition of compounds **IA** on the growth of weed stem at 200 mg/L

| **Compd.** | **R** | Stem, inhibition (%) | | | | | |
| --- | --- | --- | --- | --- | --- | --- | --- |
| monocotyledons | | | dicotyledons | | |
| *Triticum aestivum* | *Echinochloa crusgalli* | *Sorghum bicolor*(L.) Moench | *Brassica campestris* | *Raphanus sativus L* | *Cucumis sativus* |
| **IA-1** | -CH3 | 0 | 0 | 0 | 0 | 0 | 0 |
| **IA-2** | -CH2CH3 | 98 | 100 | 90 | 60 | 50 | 40 |
| **IA-3** | Ph | 90 | 50 | 70 | 60 | 70 | 60 |
| **IA-4** | 2-furyl | 60 | 0 | 0 | 0 | 0 | 0 |
| **IA-5** | 4-FPh | 80 | 0 | 0 | 0 | 0 | 0 |
| **IA-6** | 4-BrPh | 0 | 0 | 0 | 30 | 60 | 0 |
| **IA-7** | 3- NO2Ph | 80 | 0 | 0 | 60 | 80 | 100 |
| **IA-8** | 4-CH3Ph | 0 | 0 | 0 | 0 | 0 | 0 |
| **IA-9** | 4-OCH3Ph | 0 | 0 | 0 | 0 | 0 | 0 |
| **IA-10** | 3-ClC6H4 | 0 | 0 | 0 | 0 | 0 | 0 |
| **IA-11** | 2,4-ClPh | 0 | 0 | 0 | 0 | 0 | 0 |
| **IA-12** | 3,4-ClPh | 0 | 0 | 0 | 0 | 0 | 0 |
| **IA-13** | 2-thienyl | 0 | 0 | 0 | 100 | 100 | 30 |

**Table S 4:** Pre-emergencyherbicidal activity of compounds **IA-2** and **IA-3**

| **Compd.** | R | rate（gai/ha） | Pre-emergency, inhibition(%) | | | | | |
| --- | --- | --- | --- | --- | --- | --- | --- | --- |
| *Echinochloa crusgalli* | *Digitaria sanguinalis Scop* | *Setaria viridis* | *Chenopodium serotinum* | *Brassica juncea* | *Amaranthus retroflexus* |
| **IA-2** | CH2CH3 | 450 | 90 | 85 | 90 | 90 | 90 | 90 |
| 225 | 0 | 30 | 60 | 80 | 30 | 50 |
| 112.5 | 0 | 0 | 30 | 60 | 30 | 30 |
| **IA-3** | C6H5 | 450 | 30 | 90 | 98 | 100 | 80 | 85 |
| 225 | 30 | 70 | 90 | 100 | 60 | 85 |
| 112.5 | 0 | 30 | 90 | 98 | 30 | 75 |

**Table S 5:** Post-emergencyherbicidal activity of compounds **IA-2** and **IA-3**

| **Compd.** | R | rates（gai/ha） | Post-emergence, inhibition (%) | | | | | |
| --- | --- | --- | --- | --- | --- | --- | --- | --- |
| *Echinochloa crusgalli* | *Digitaria sanguinalis Scop* | *Setaria viridis* | *Chenopodium serotinum* | *Brassica juncea* | *Amaranthus retroflexus* |
| **IA-2** | CH2CH3 | 450 | 90 | 90 | 90 | 95 | 100 | 100 |
| 225 | 60 | 0 | 0 | 90 | 100 | 100 |
| 112.5 | 30 | 0 | 0 | 70 | 100 | 100 |
| **IA-3** | C6H5 | 450 | 95 | 50 | 95 | 90 | 100 | 100 |
| 225 | 90 | 30 | 80 | 90 | 100 | 100 |
| 112.5 | 70 | 30 | 50 | 85 | 100 | 100 |
| M3 | | 450 | 75 | 70 | 80 | 80 | 85 | 70 |
| 150 | 70 | 60 | 70 | 70 | 70 | 60 |
| M4 | | 450 | 75 | 70 | 75 | 80 | 85 | 75 |
| 150 | 70 | 60 | 75 | 75 | 80 | 70 |

**Table S 6:** Crop Selectivity of the title compound **IA-3**

| **Compd.** | R | rate（gai/ha） | Inhibition% | | | | | | | |
| --- | --- | --- | --- | --- | --- | --- | --- | --- | --- | --- |
| corn | | bean | | cotton | | rice | |
| pre | post | pre | post | pre | post | pre | post |
| **IA-3** | C6H5 | 450 | 20 | 40 | 30 | 0 | 40 | 30 | 20 | 0 |
| 225 | 10 | 20 | 10 | 0 | 20 | 10 | 10 | 0 |
| 112.5 | 0 | 10 | 0 | 0 | 0 | 10 | 0 | 0 |

**1-(5,5-dimethyl-2-oxido-1,3,2-dioxaphosphinan-2-yl)ethyl-2-((4,6-dimethoxypyrimidin-2-yl)oxy)benzoate (IA-1).**

**Figure S 1** 1H NMR of the title compound **IA-1**


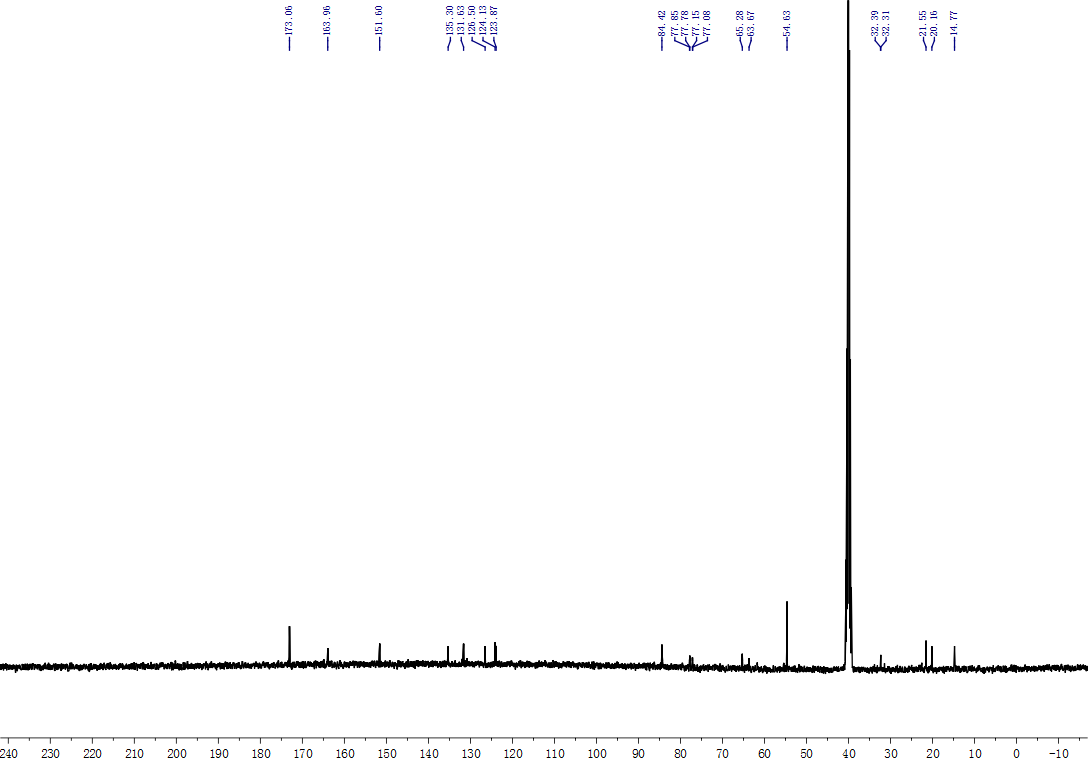


**Figure S 2** 13C NMR of the title compound **IA-1**

**Figure S 3** 31P NMR of the title compound **IA-1**

**Figure S 4** HRMS of the title compound **IA-1**

**1-(5,5-dimethyl-2-oxido-1,3,2-dioxaphosphinan-2-yl)propyl-2-((4,6-dimethoxypyrimidin-2-yl)oxy)benzoate (IA-2)**


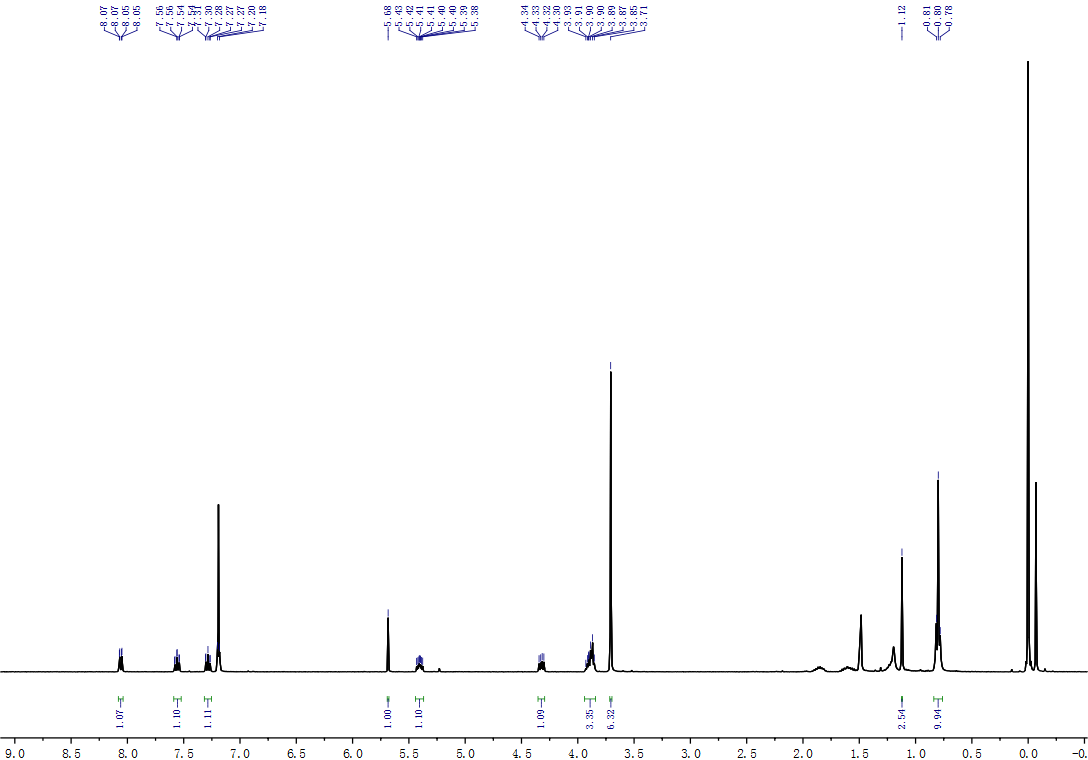


**Figure S 5** 1H NMR of the title compound **IA-2**


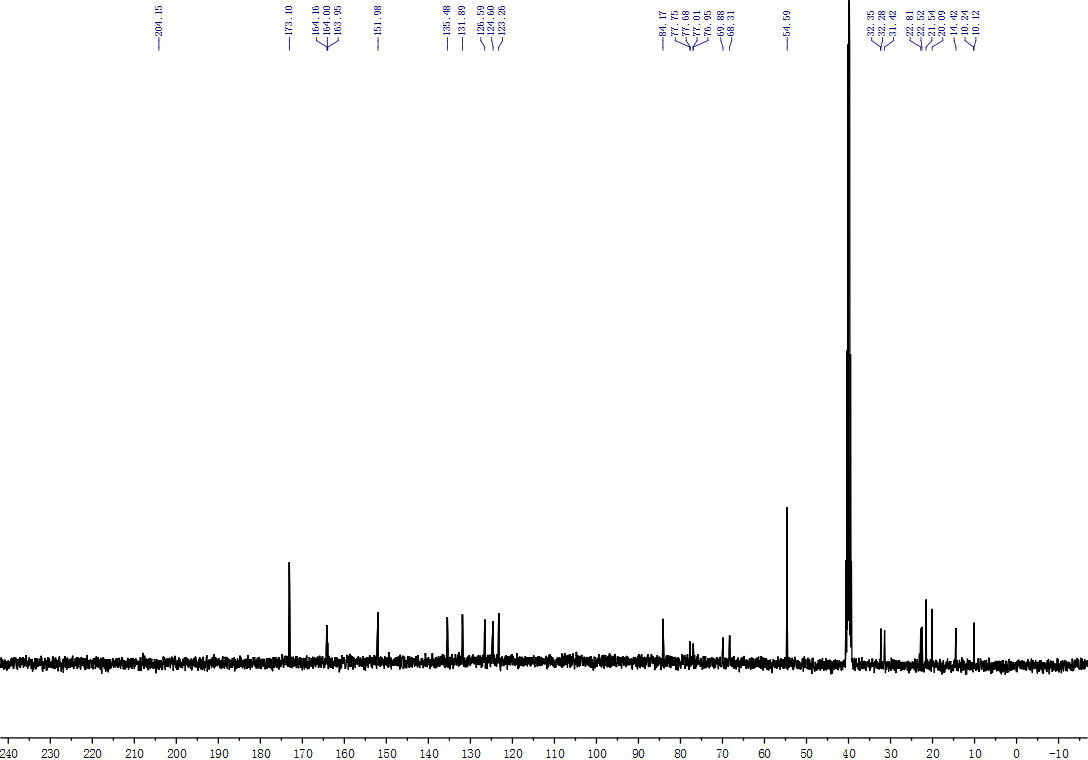


**Figure S**  6 13C NMR of the title compound **IA-2**

**Figure S**  7 31P NMR of the title compound **IA-2**

**Figure S 8** HRMS of the title compound **IA-2**

**(5,5-dimethyl-2-oxido-1,3,2-dioxaphosphinan-2-yl)(phenyl)methyl-2-((4,6-dimethoxypyrimidin-2-yl)oxy)benzoate (IA-3)**


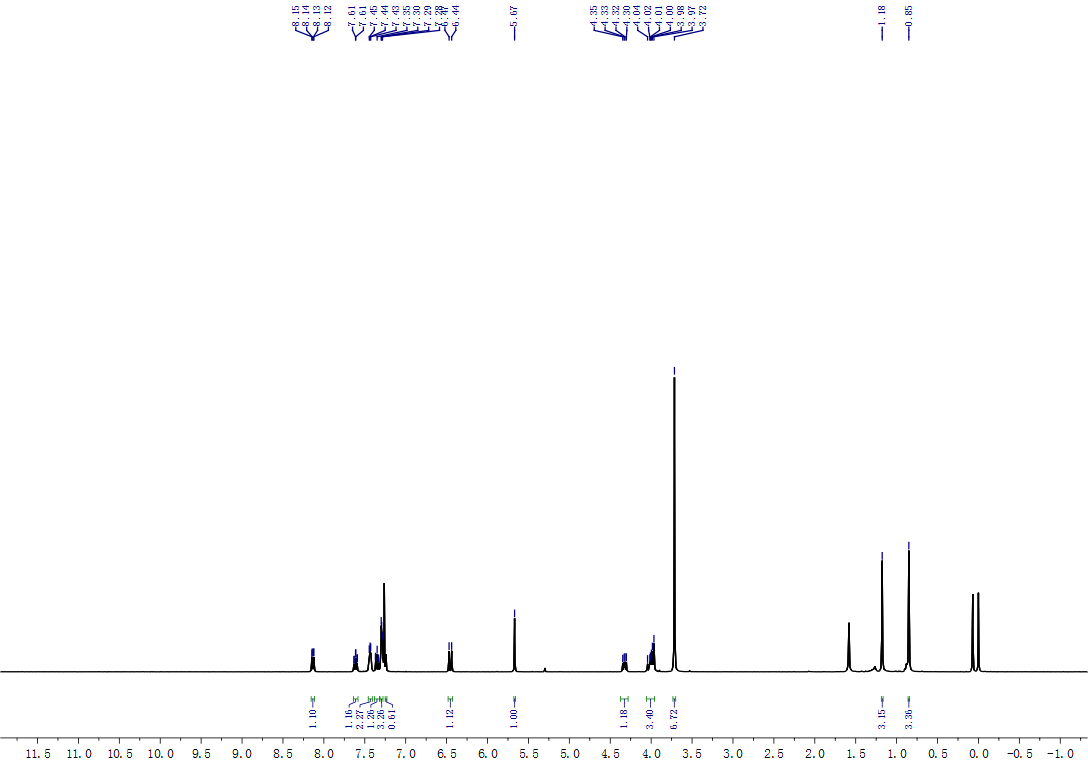


**Figure S 9** 1H NMR of the title compound **IA-3**


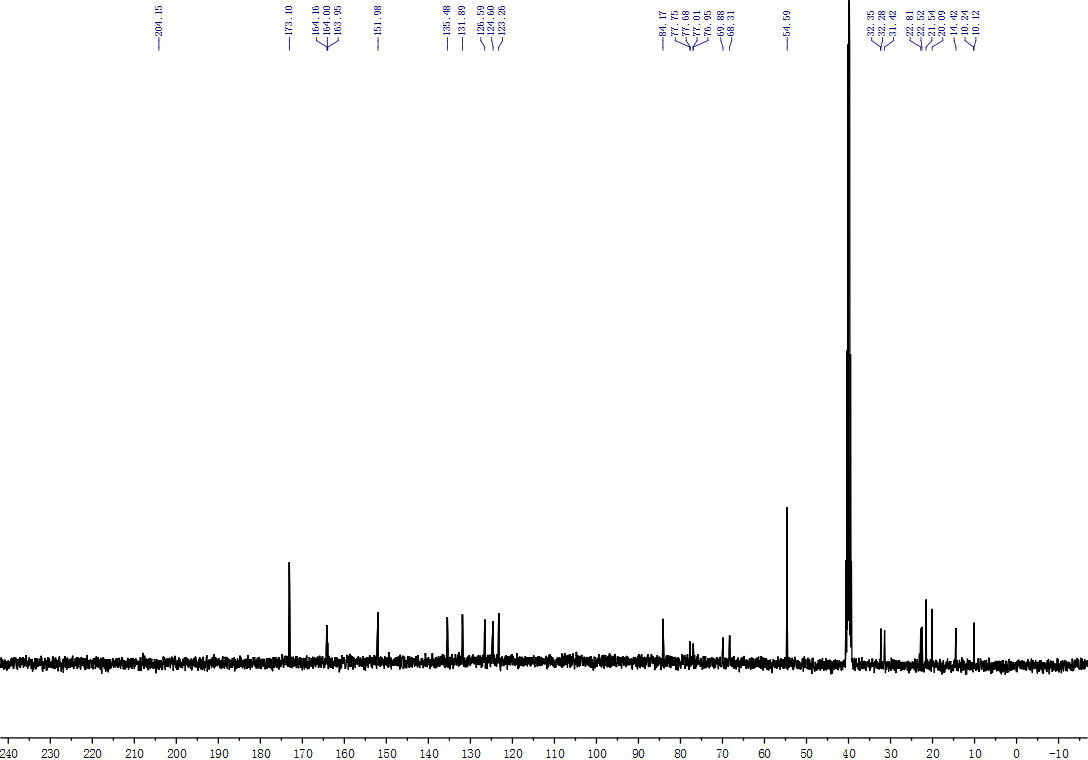


**Figure S 10** 13C NMR of the title compound **IA-3**

**Figure S 11** 31P NMR of the title compound **IA-3**

**Figure S 12** HRMS of the title compound **IA-3**

**(5,5-dimethyl-2-oxido-1,3,2-dioxaphosphinan-2-yl)(furan-2-yl)methyl-2-((4,6-dimethoxypyrimidin-2-yl)oxy)benzoate (IA-4).**


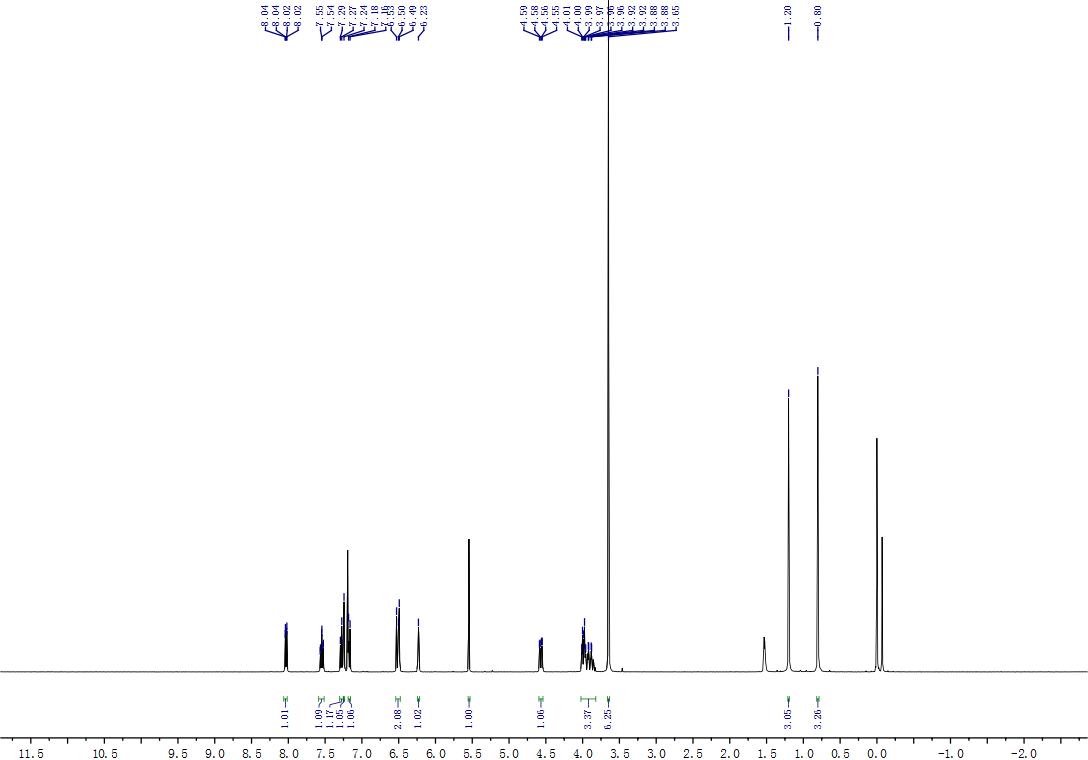


**Figure S 13** 1H NMR of the title compound **IA-4**


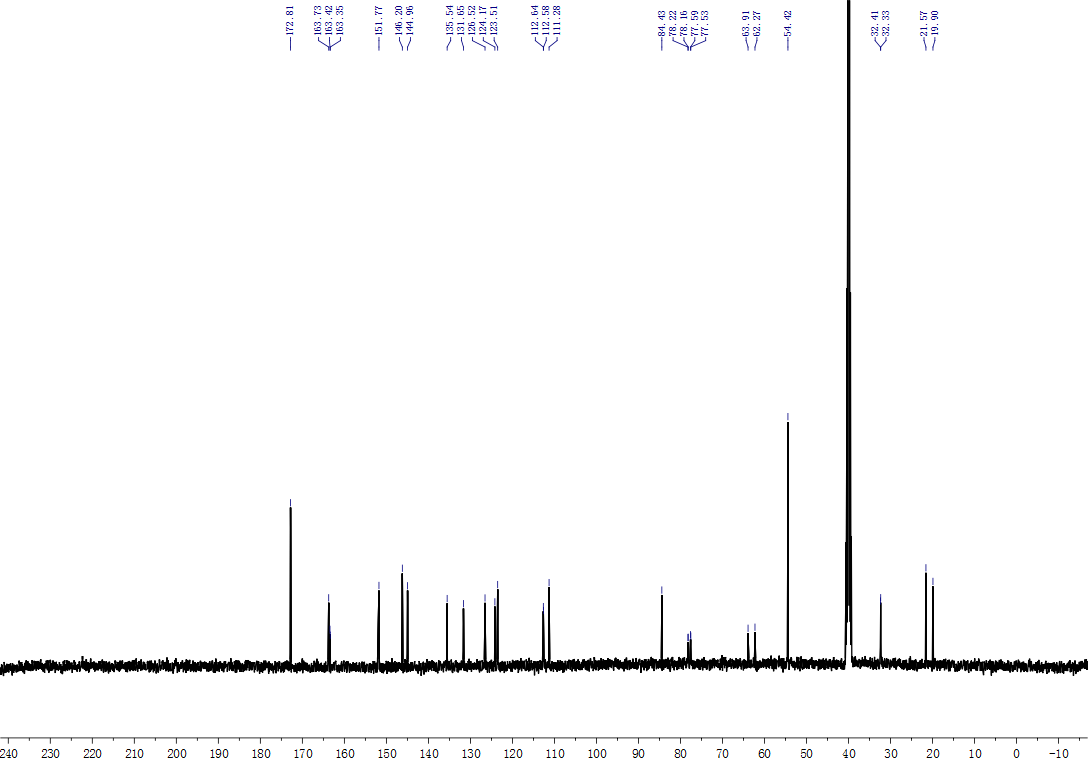


**Figure S 14** 13C NMR of the title compound **IA-4**

**Figure S 15** 31P NMR of the title compound **IA-4**

**Figure S 16** HRMS of the title compound **IA-4**

**(5,5-dimethyl-2-oxido-1,3,2-dioxaphosphinan-2-yl)(4-fluorophenyl)methyl-2-((4,6-dimethoxypyrimidin-2-yl)oxy)benzoate (IA-5).**


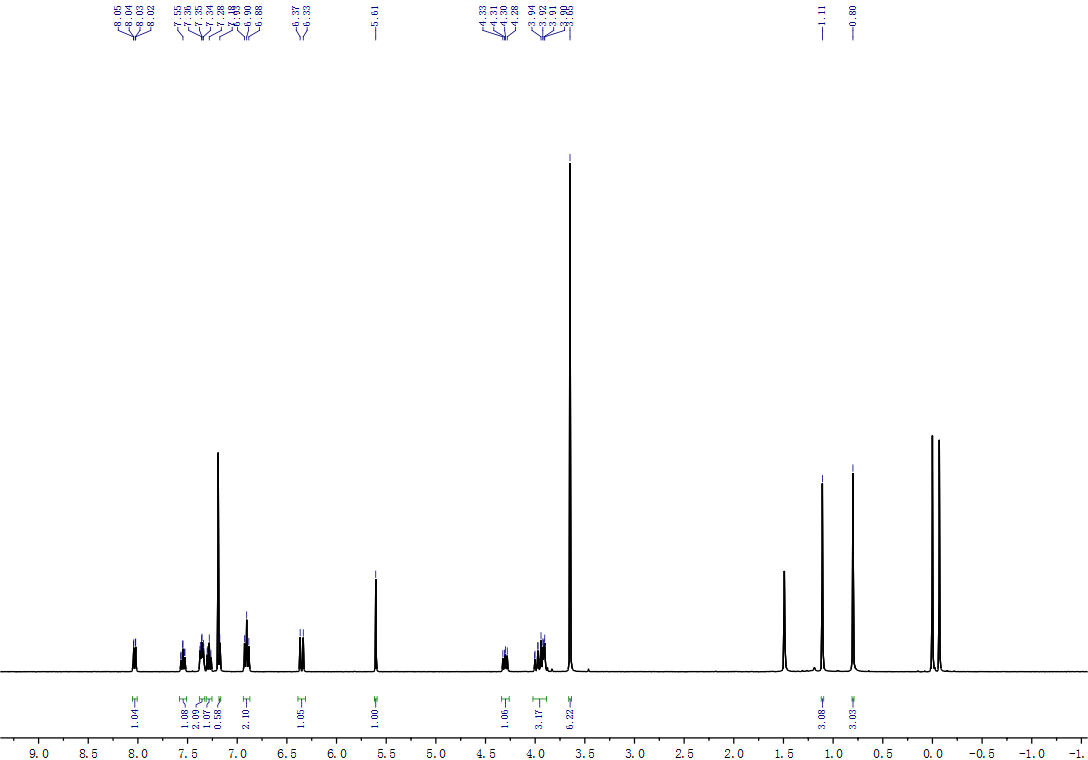


**Figure S**  **17** 1H NMR of the title compound **IA-5**


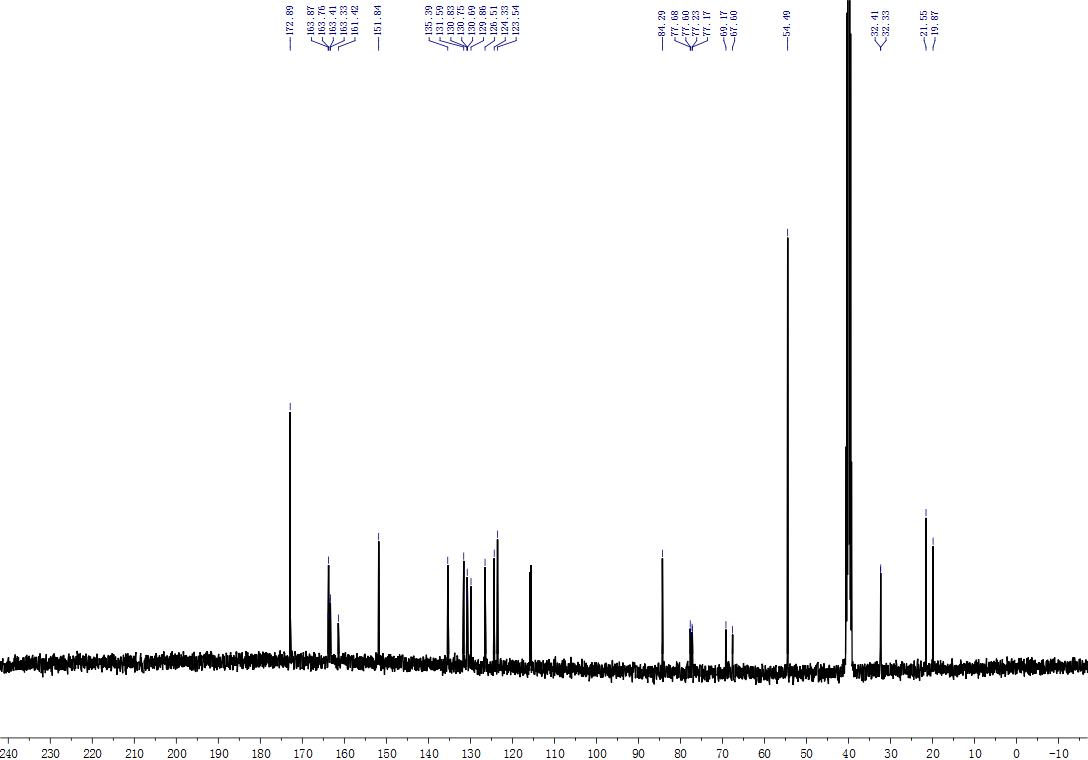


**Figure S**  **18** 13C NMR of the title compound **IA-5**

**
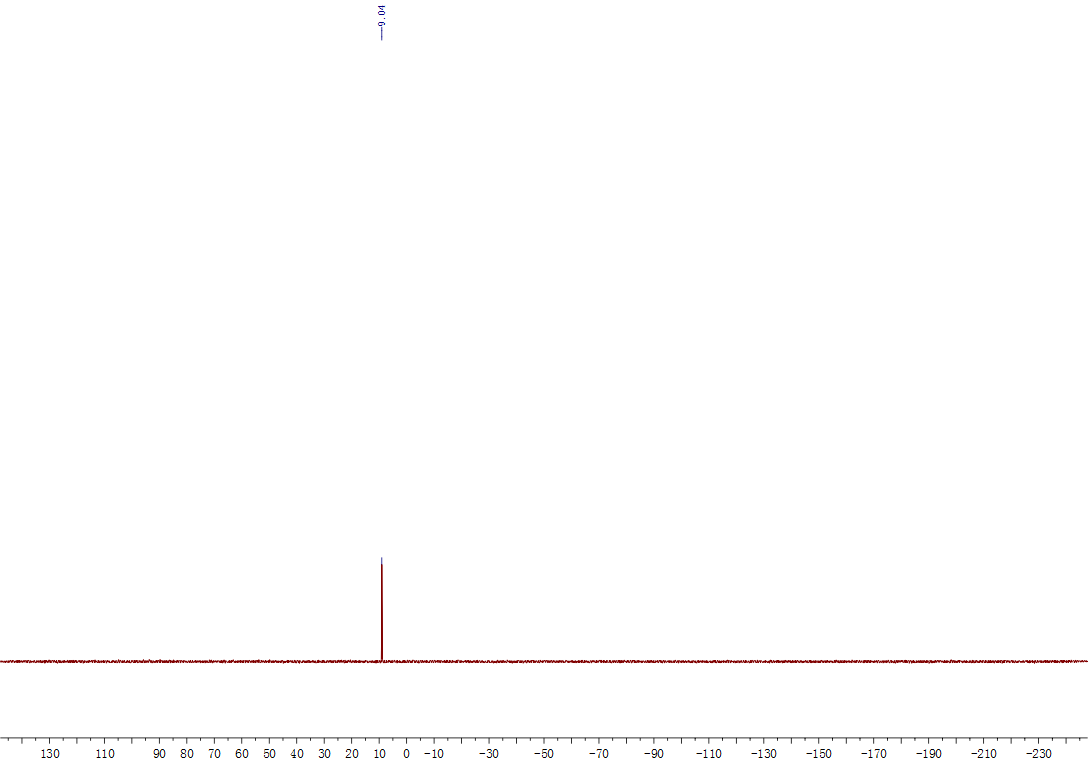
**

**Figure S 19** 31P NMR of the title compound **IA-5**

**Figure S 20** HRMS of the title compound **IA-5**

**(4-bromophenyl)(5,5-dimethyl-2-oxido-1,3,2-dioxaphosphinan-2-yl)methyl 2-((4,6-dimethoxypyrimidin-2-yl)oxy)benzoate (IA-6).**


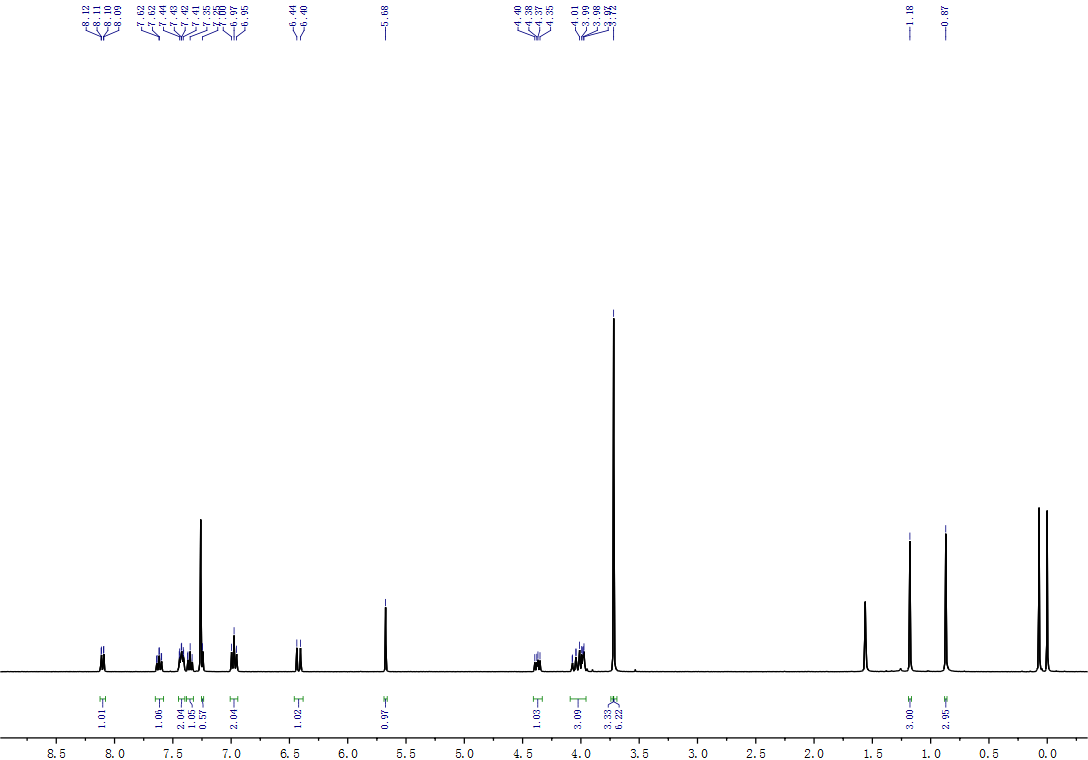


**Figure S 21** 1H NMR of the title compound **IA-6**


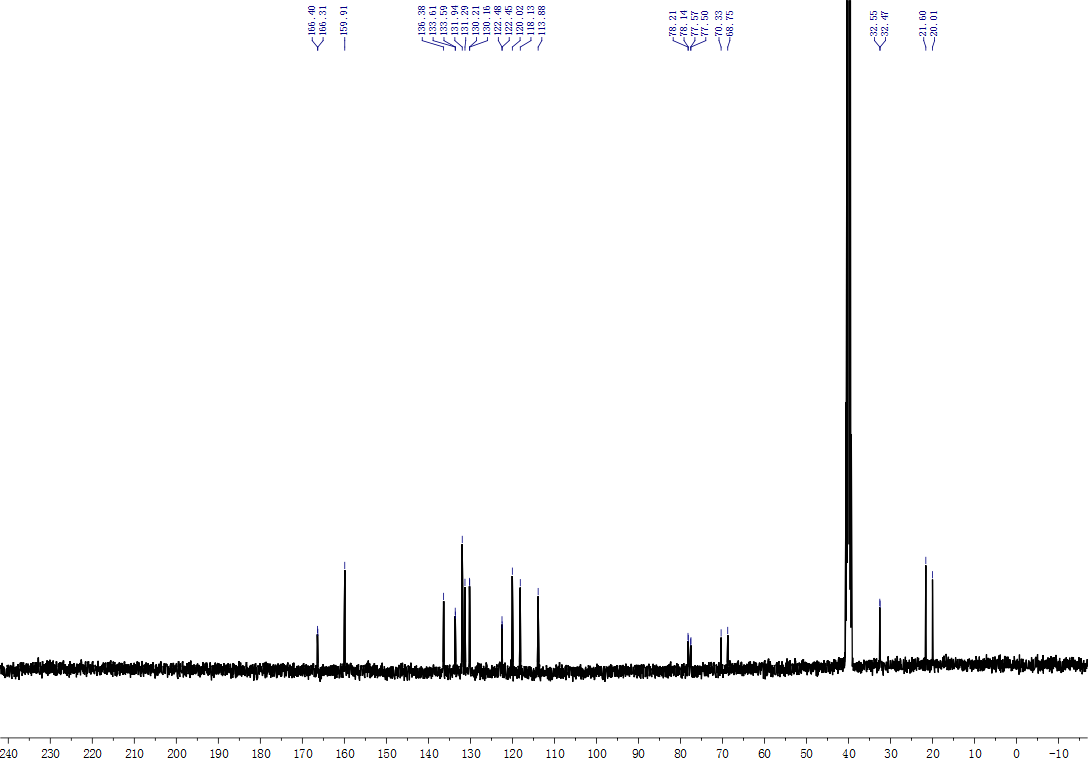


**Figure S 22** 13C NMR of the title compound **IA-6**

**Figure S 23** 31P NMR of the title compound **IA-6**

**Figure S 24** HRMS of the title compound **IA-6**

**(5,5-dimethyl-2-oxido-1,3,2-dioxaphosphinan-2-yl)(3-nitrophenyl)methyl-2-((4,6-dimethoxypyrimidin-2-yl)oxy)benzoate (IA-7).**


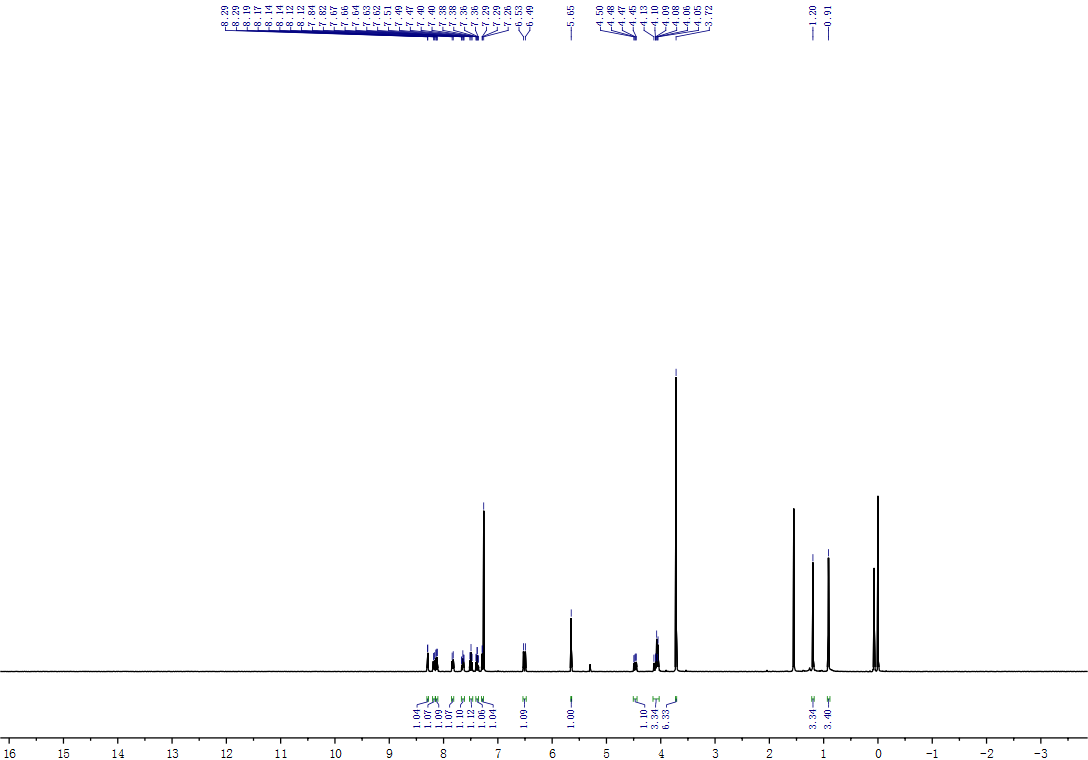


**Figure S 25** 1H NMR of the title compound **IA-7**


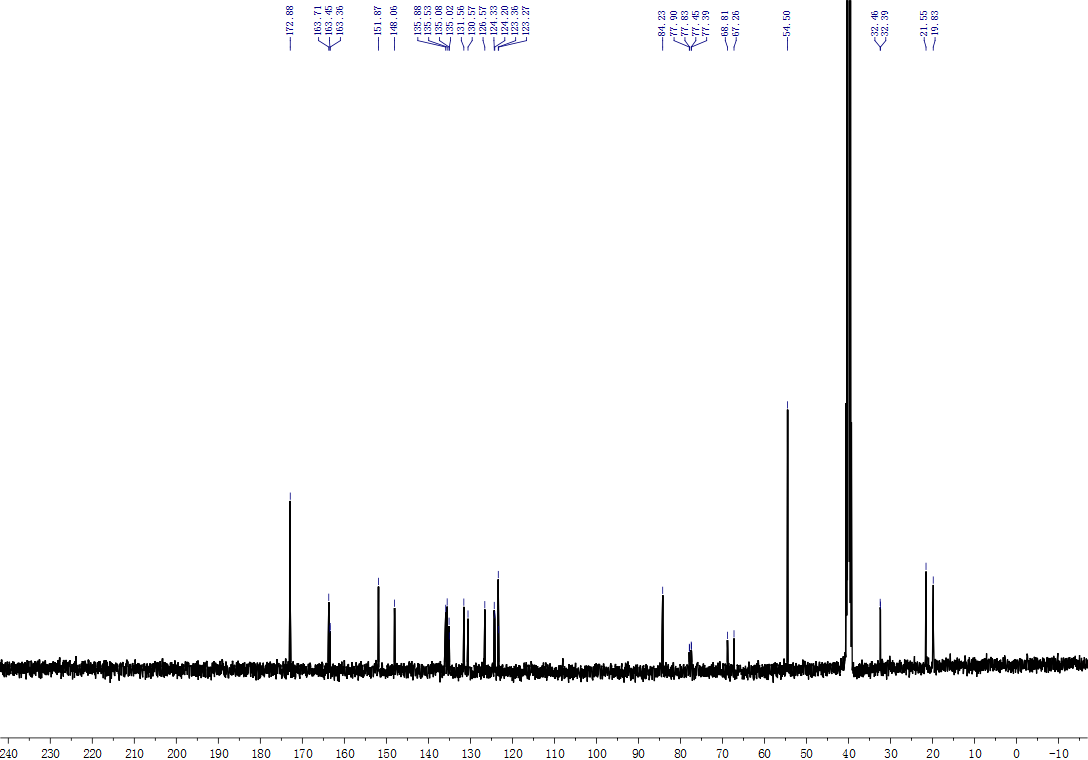


**Figure S 26** 13C NMR of the title compound **IA-7**

**Figure S 27** 31P NMR of the title compound **IA-7**

**Figure S 28** HRMS of the title compound **IA-7**

**(5,5-dimethyl-2-oxido-1,3,2-dioxaphosphinan-2-yl)(p-tolyl)methyl-2-((4,6-dimethoxypyrimidin-2-yl)oxy)benzoate (IA-8).**


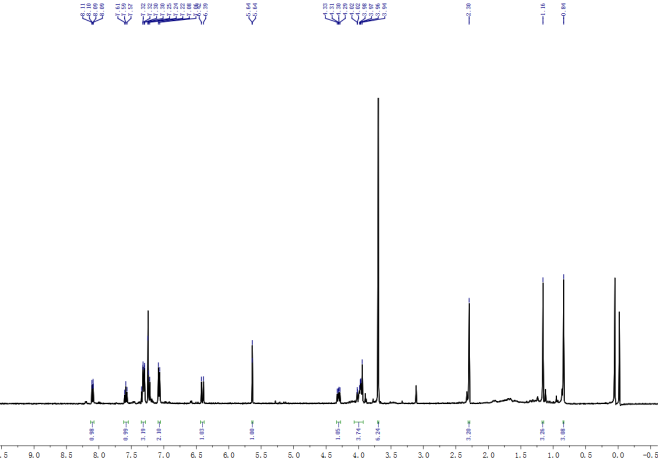


**Figure S 29** 1H NMR of the title compound **IA-8**


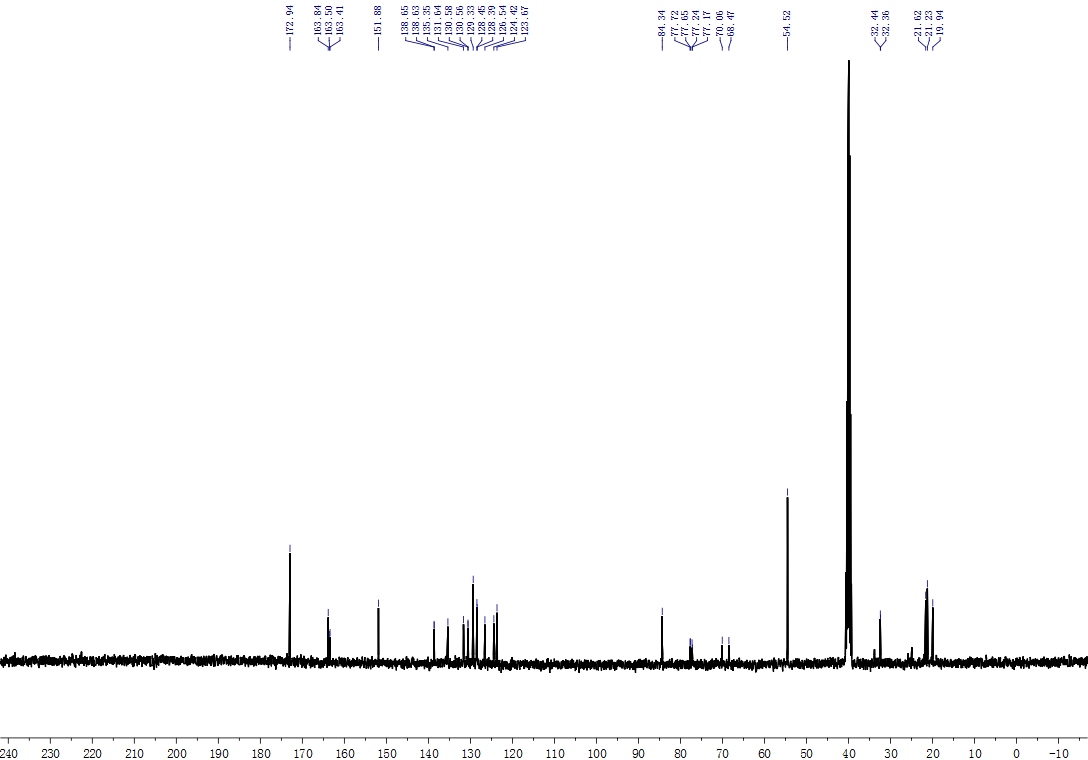


**Figure S 30** 13C NMR of the title compound **IA-8**

**Figure S 31** 31P NMR of the title compound **IA-8**

**Figure S 32** HRMS of the title compound **IA-8**

**(5,5-dimethyl-2-oxido-1,3,2-dioxaphosphinan-2-yl)(4-methoxyphenyl)methyl-2-((4,6-dimethoxypyrimidin-2-yl)oxy)benzoate (IA-9).**


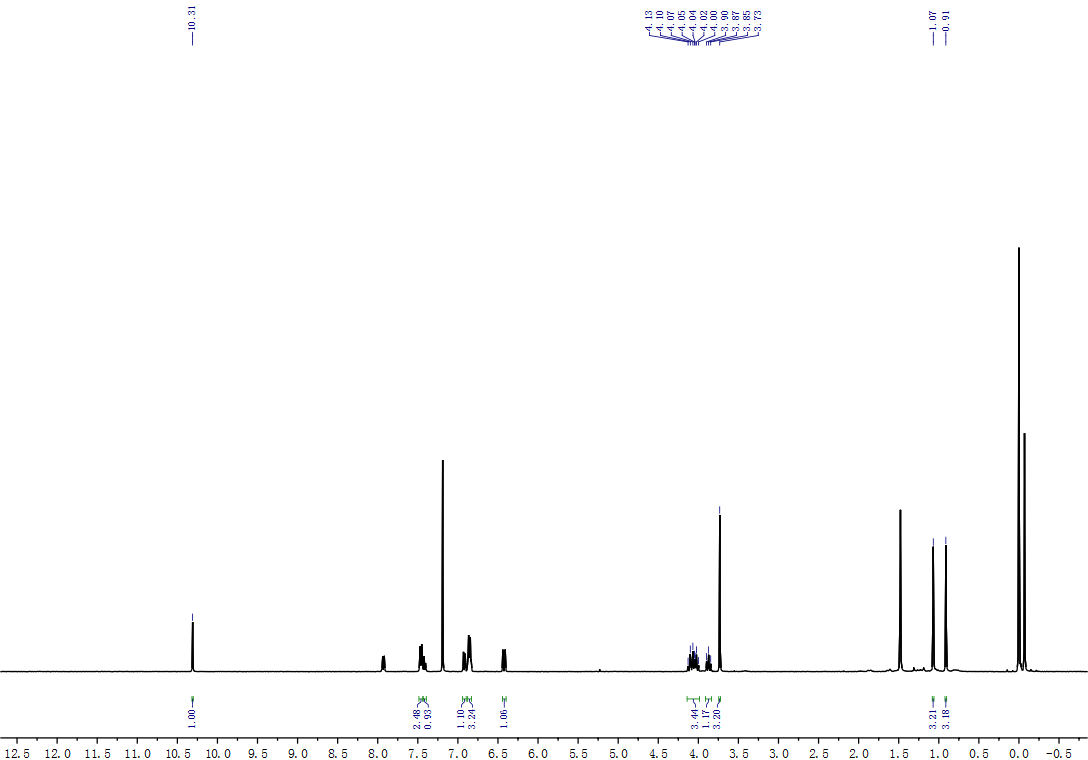


**Figure S 33** 1H NMR of the title compound **IA-9**


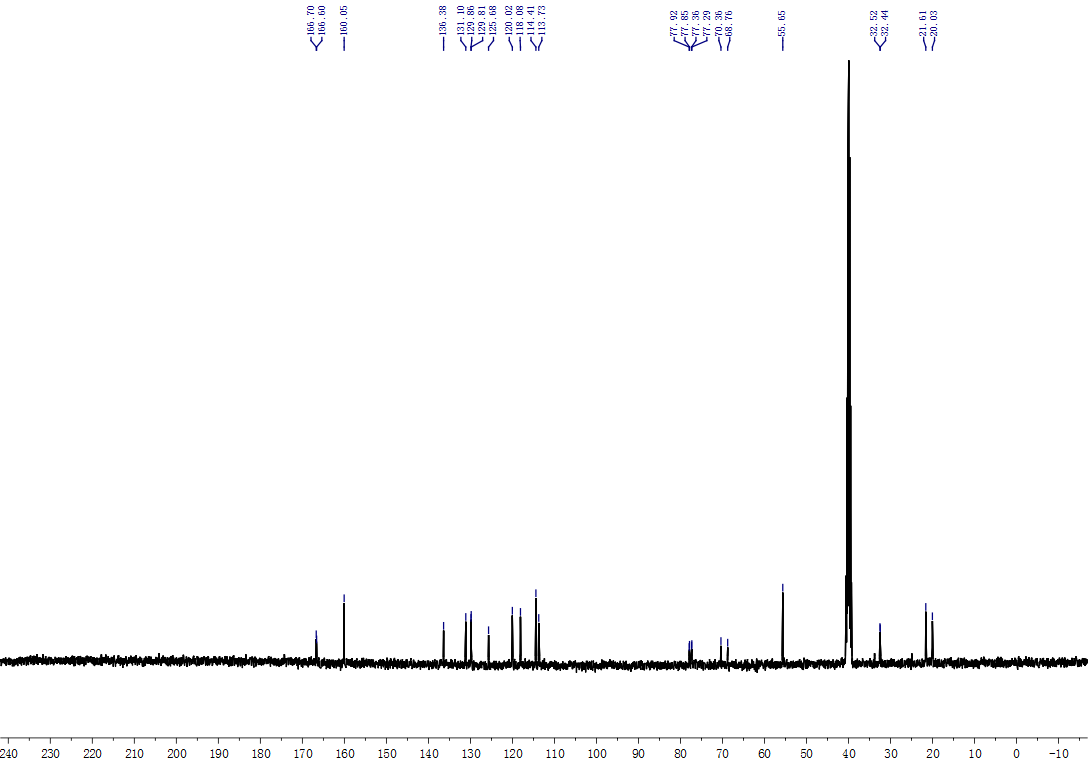


**Figure S 34** 13C NMR of the title compound **IA-9**

**Figure S 35** 31P NMR of the title compound **IA-9**

**Figure S 36** HRMS of the title compound **IA-9**

**(3-chlorophenyl)(5,5-dimethyl-2-oxido-1,3,2-dioxaphosphinan-2-yl)methyl-2-((4,6-dimethoxypyrimidin-2-yl)oxy)benzoate (IA-10).**


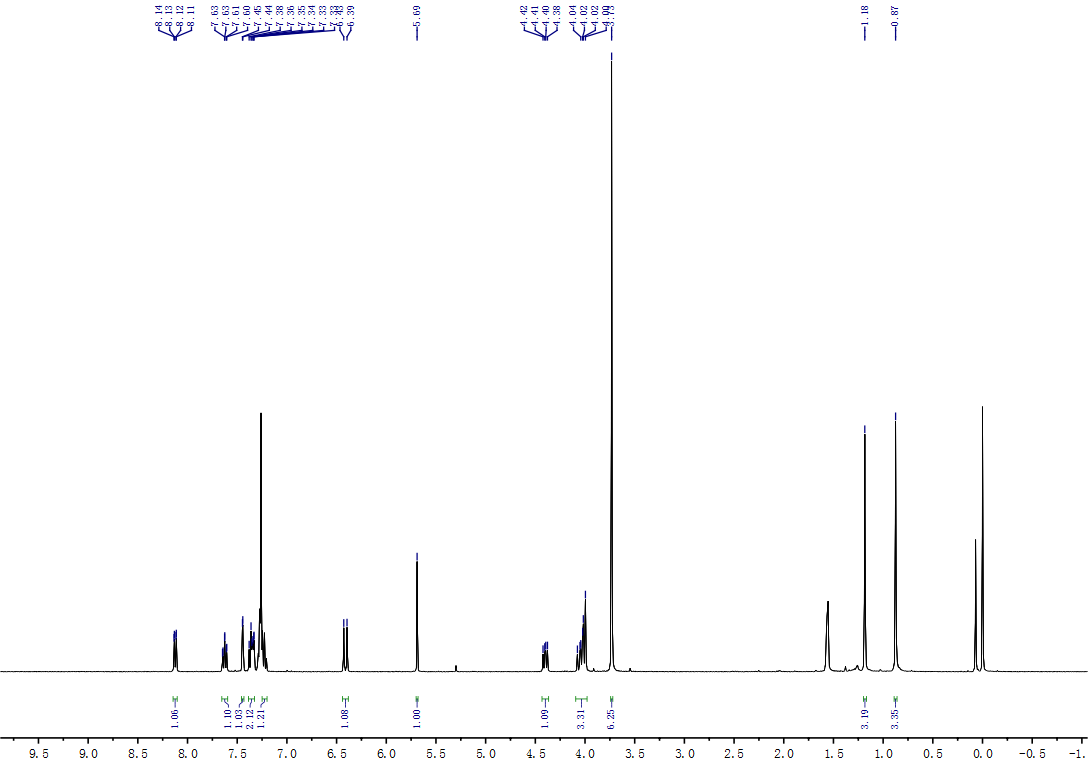


**Figure S 37** 1H NMR of the title compound **IA-10**


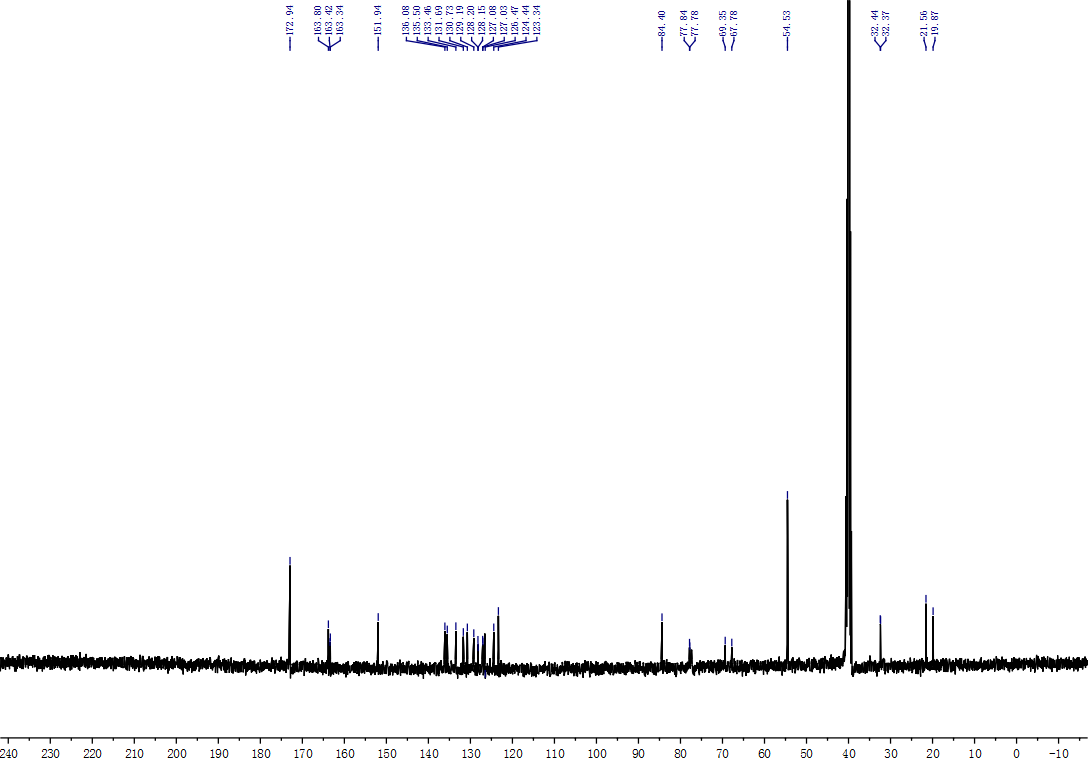


**Figure S 38** 13C NMR of the title compound **IA-10**

**Figure S 39** 31P NMR of the title compound **IA-10**

**Figure S 40** HRMS of the title compound **IA-10**

**(2,4-dichlorophenyl)(5,5-dimethyl-2-oxido-1,3,2-dioxaphosphinan-2-yl)methyl-2-((4,6-dimethoxypyrimidin-2-yl)oxy)benzoate (IA-11).**


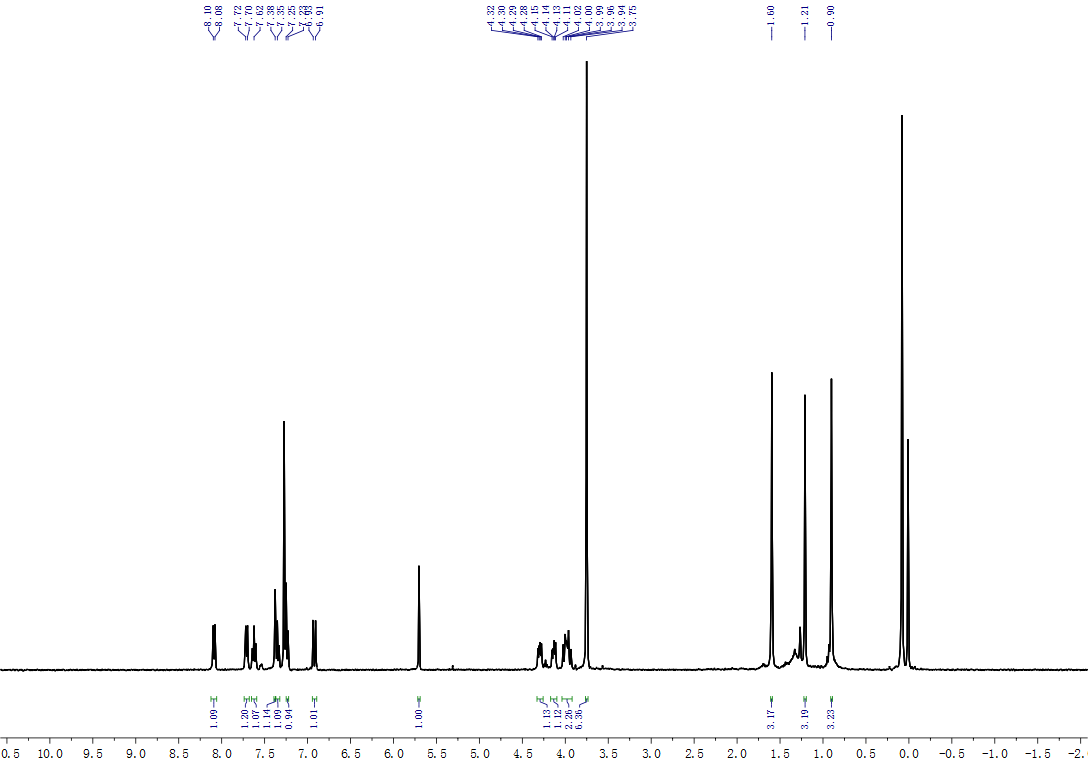


**Figure S 41** 1H NMR of the title compound **IA-11**


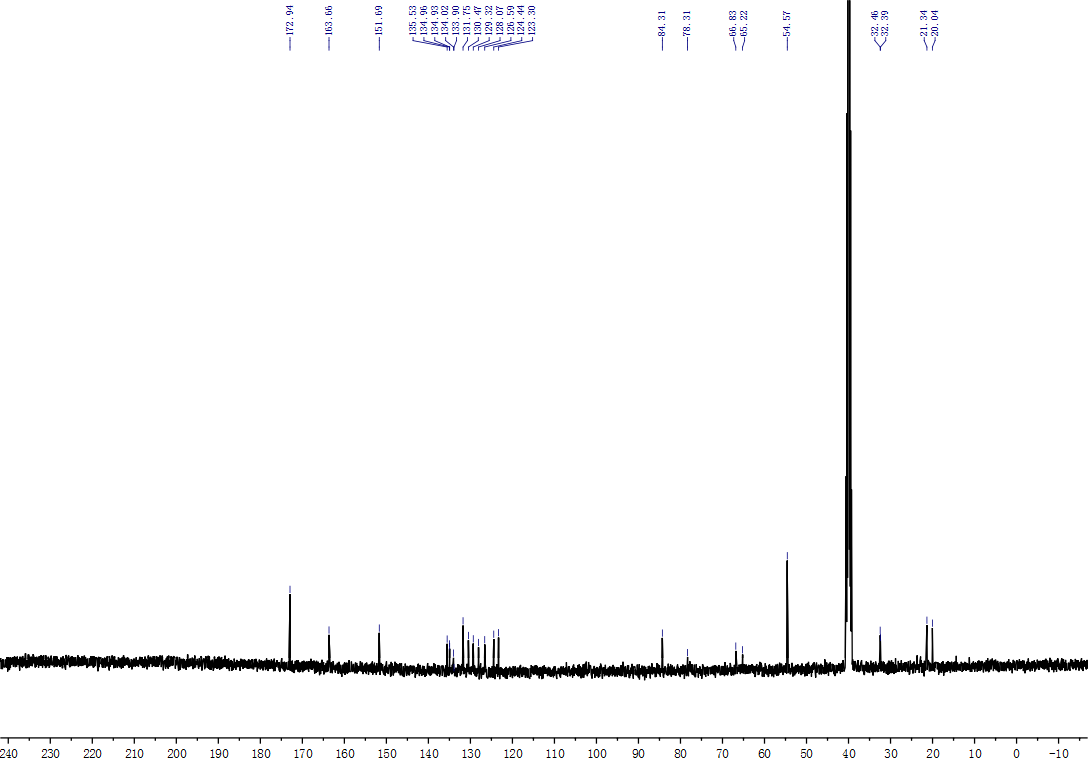


**Figure S 42** 13C NMR of the title compound **IA-11**

**Figure S 43** 31P NMR of the title compound **IA-11**

**Figure S 44** HRMS of the title compound **IA-11**

**(3,4-dichlorophenyl)(5,5-dimethyl-2-oxido-1,3,2-dioxaphosphinan-2-yl)methyl-2-((4,6-dimethoxypyrimidin-2-yl)oxy)benzoate (IA-12)**


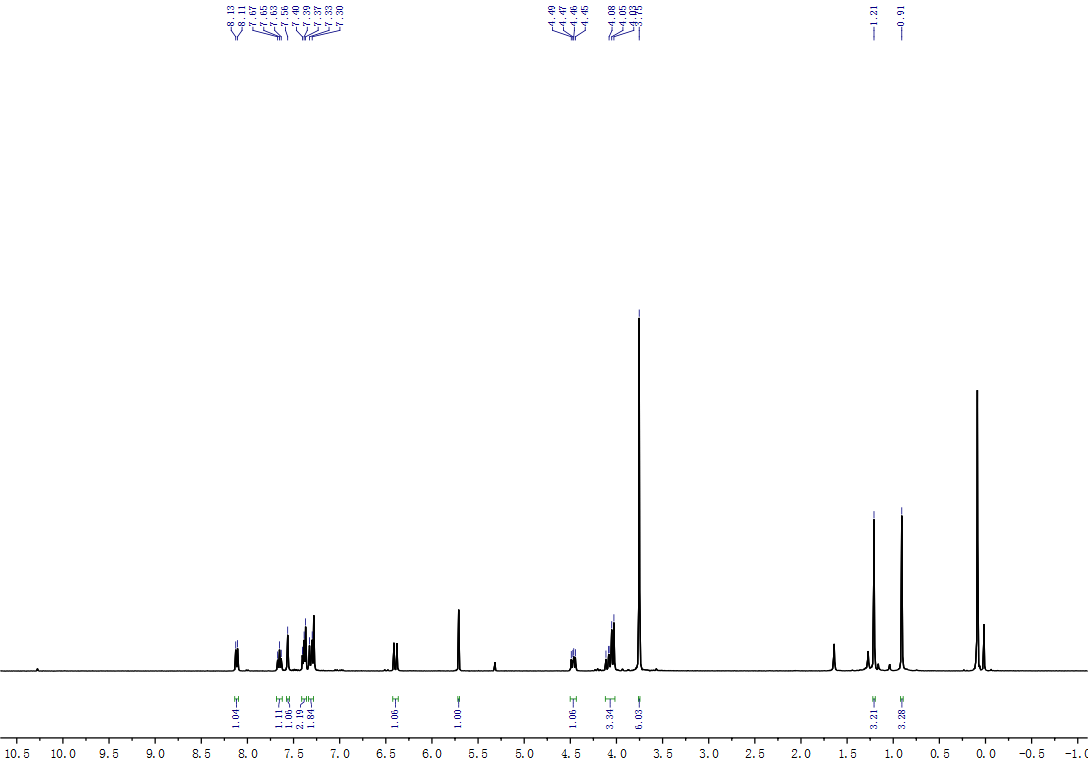


**Figure S 45** 1H NMR of the title compound **IA-12**


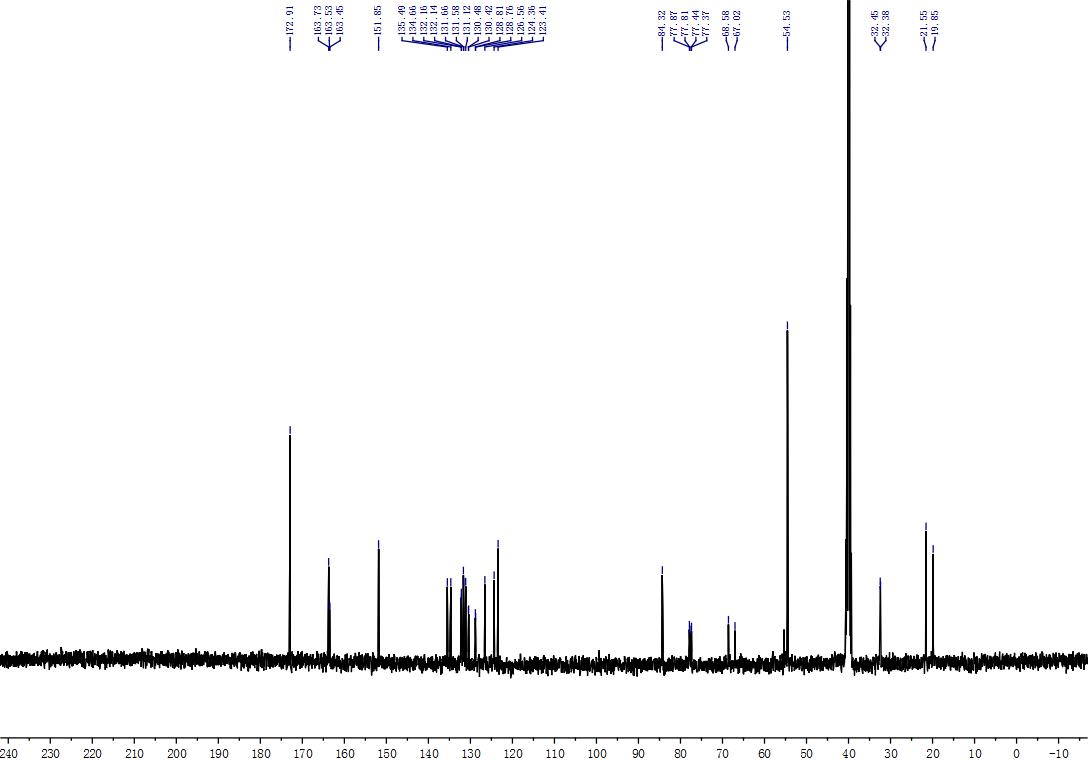


**Figure S 46** 13C NMR of the title compound **IA-12**

**Figure S 47** 31P NMR of the title compound **IA-12**

**Figure S 48** HRMS of the title compound **IA-12**

**(5,5-dimethyl-2-oxido-1,3,2-dioxaphosphinan-2-yl)(thiophen-2-yl)methyl-2-((4,6-dimethoxypyrimidin-2-yl)oxy)benzoate (IA-13).**


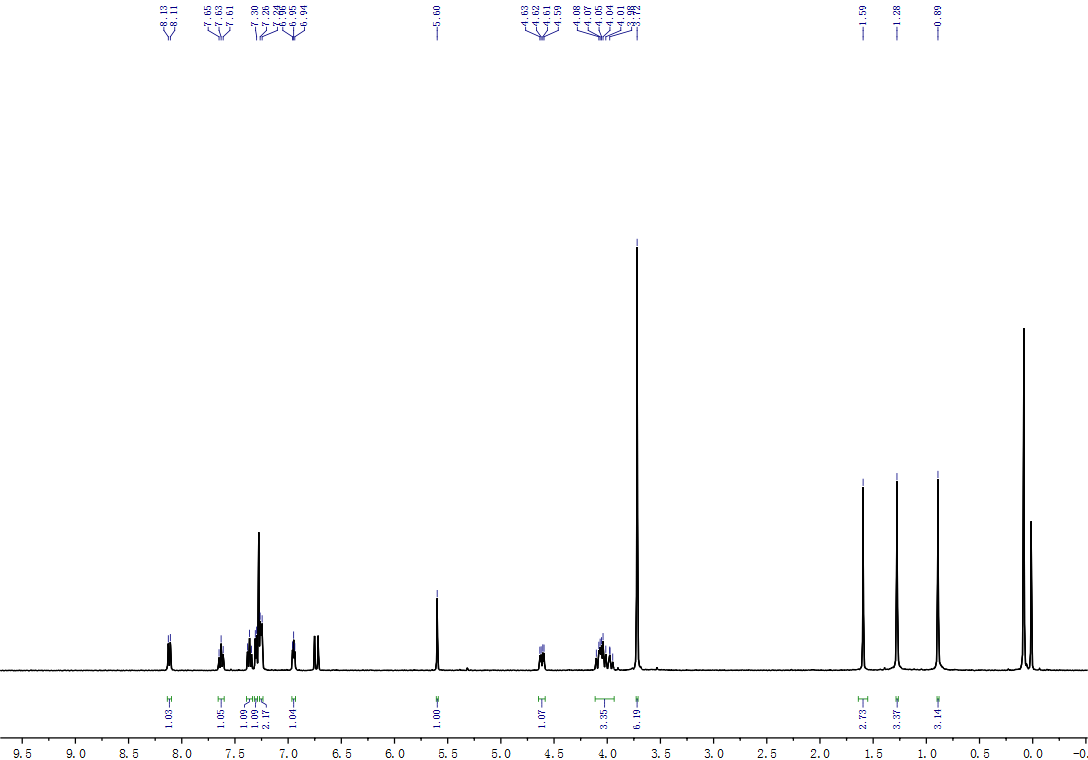


**Figure S 49** 1H NMR of the title compound **IA-13**


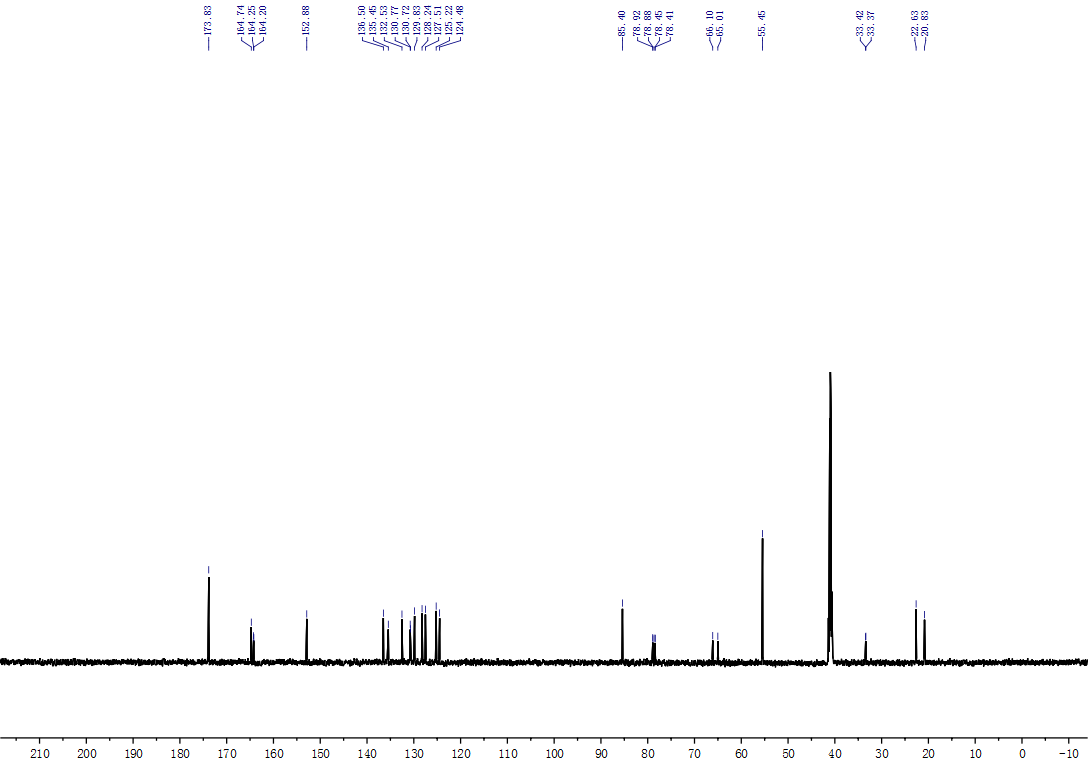


**Figure S 50** 13C NMR of the title compound **IA-13**

**Figure S 51** 31P NMR of the title compound **IA-13**

**Figure S 52** HRMS of the title compound **IA-13**
